# Supplementary material
Source: PubMed Central journal article supplement (PMC9757132)

# Supplemental Figure 1

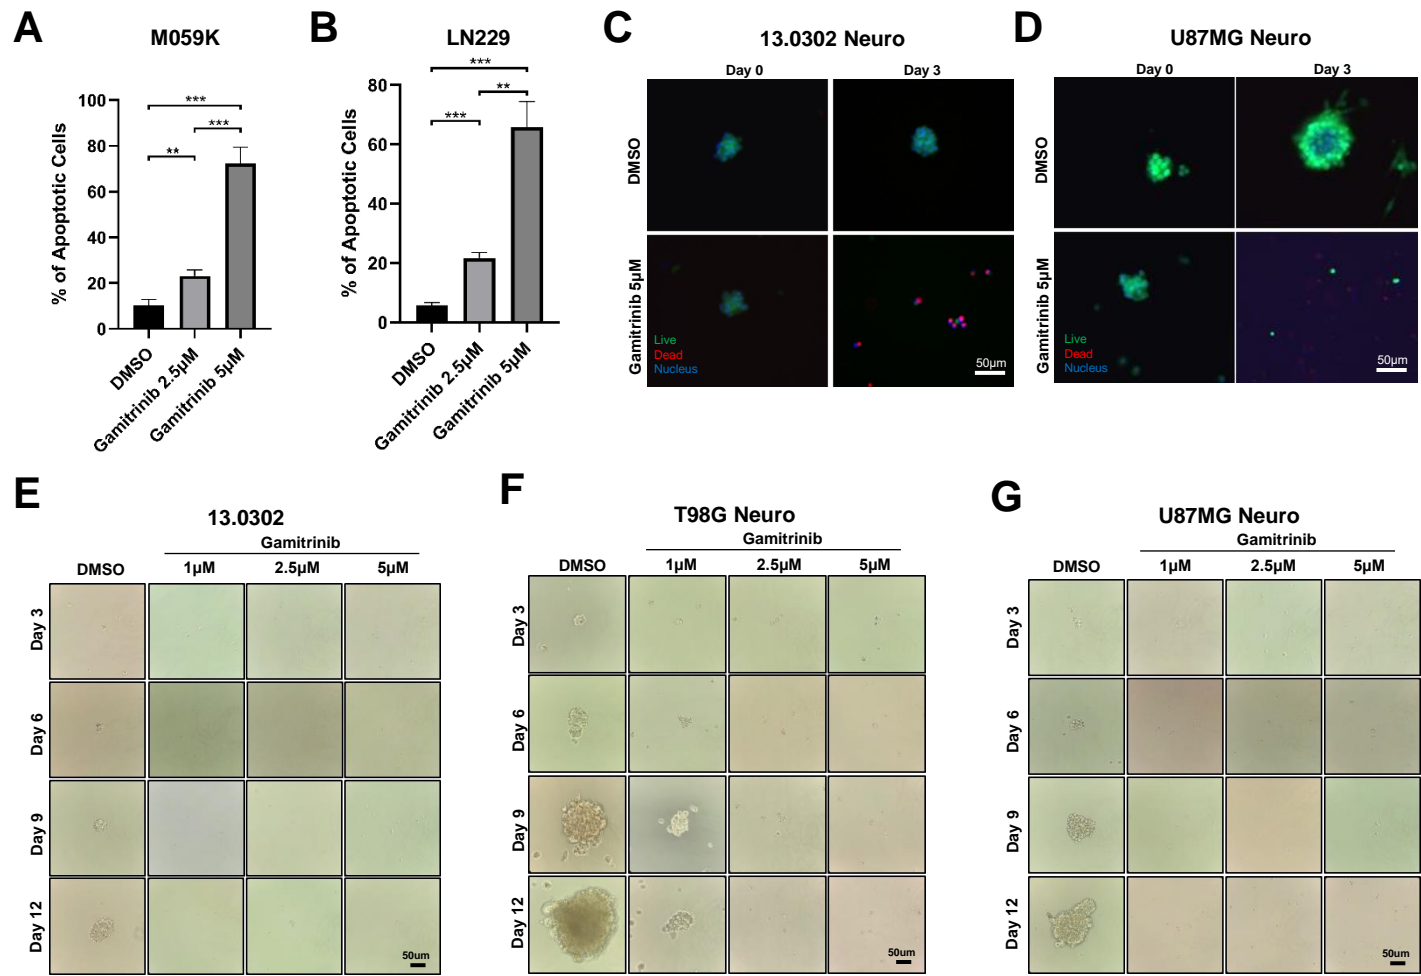

# Supplemental Figure 2

**A**

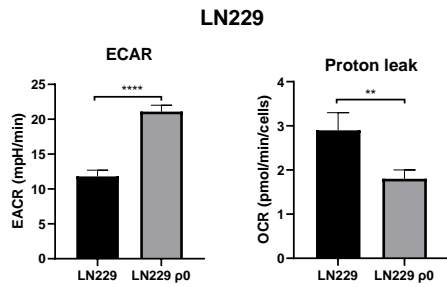

**B**

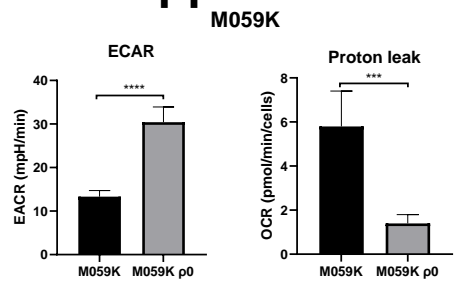

**C**

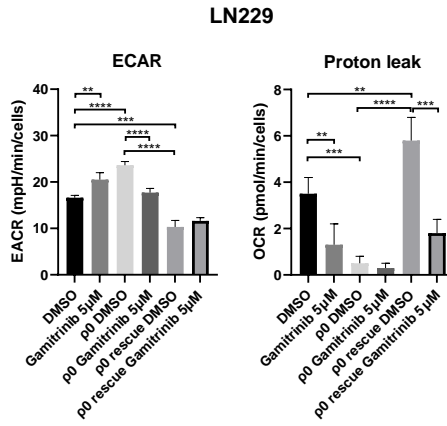

**D**

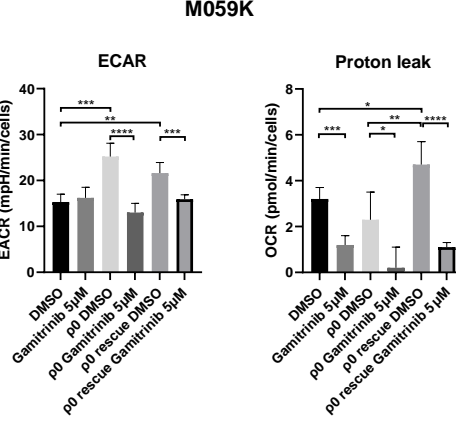

**E**

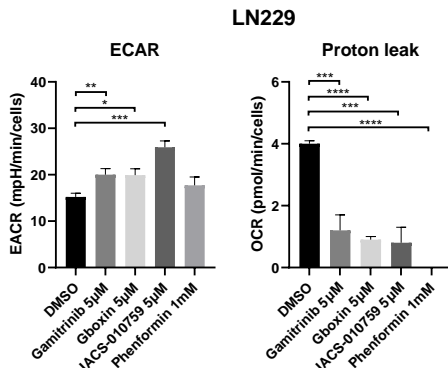

**F**

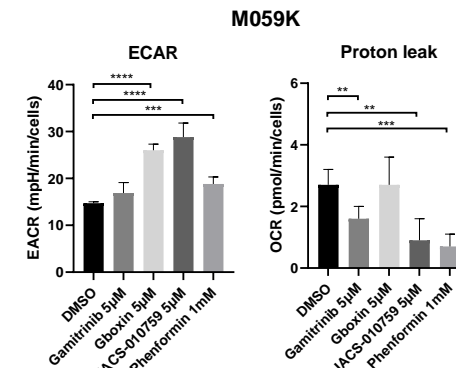

**G**

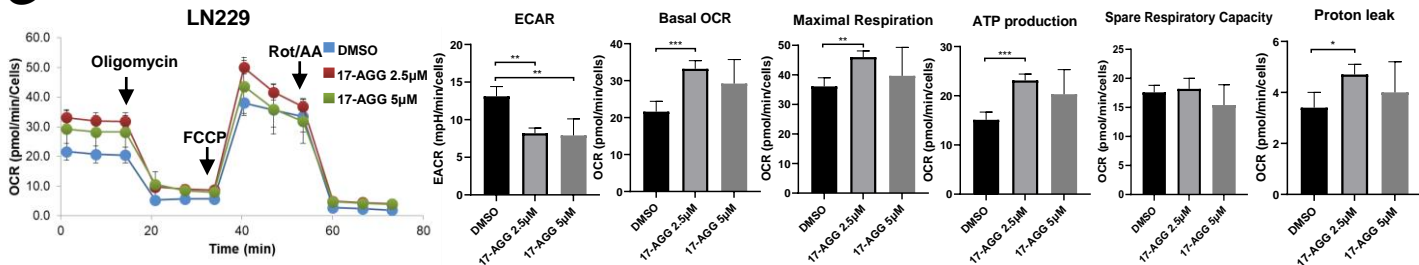

**H**

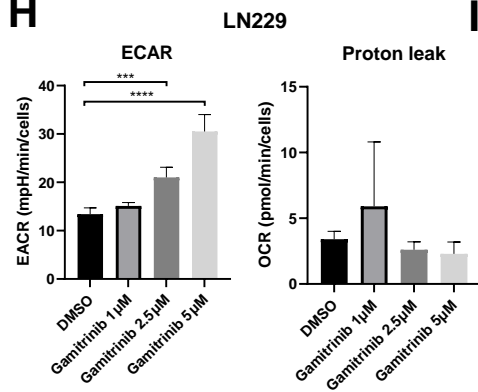

**I**

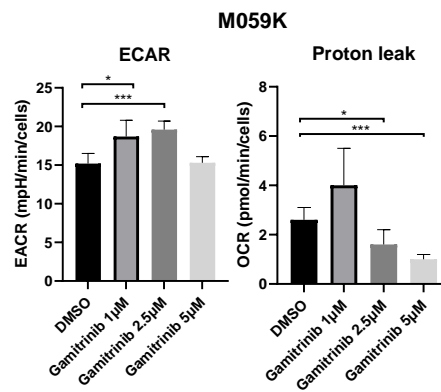

**J**

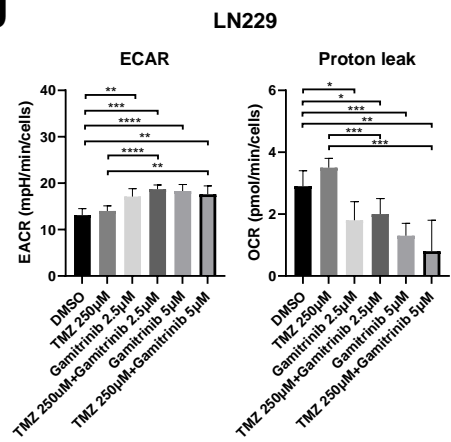

# Supplemental Figure 3

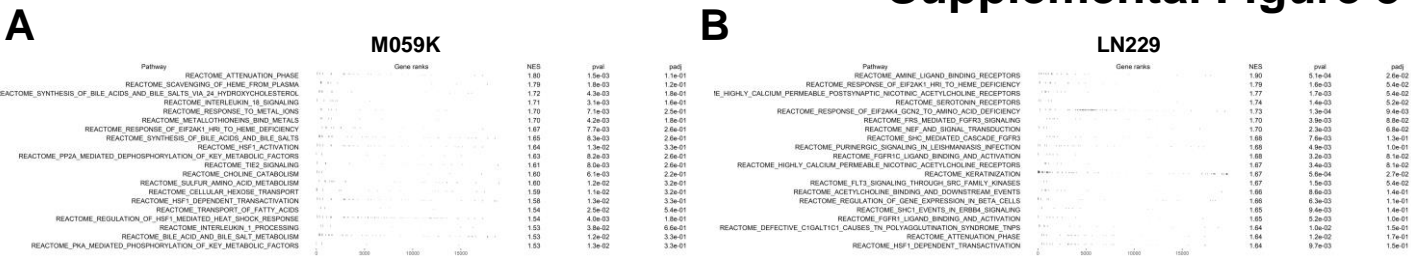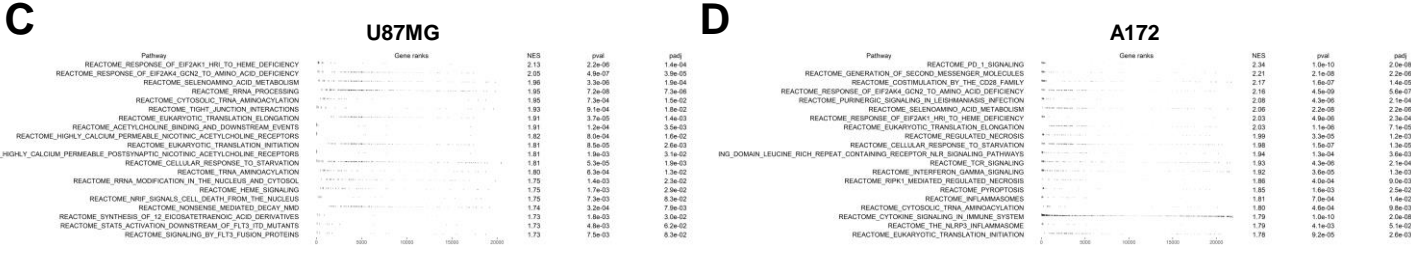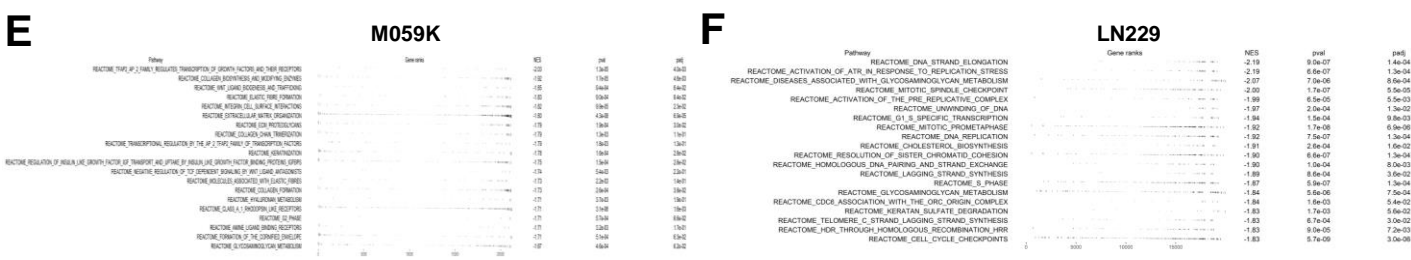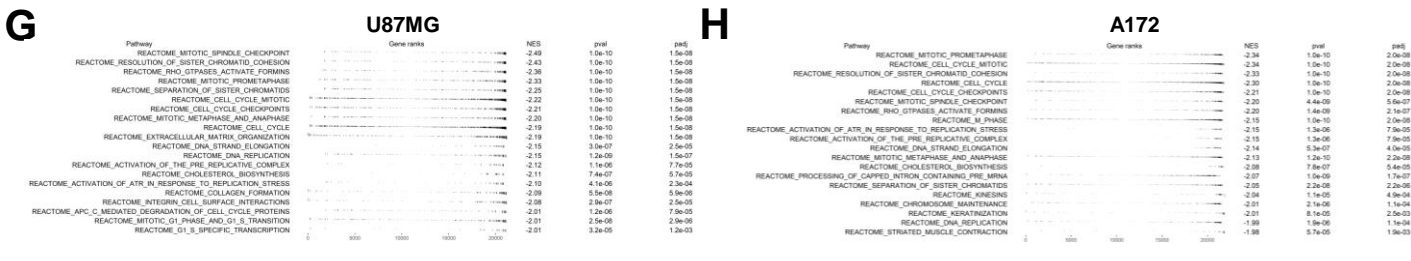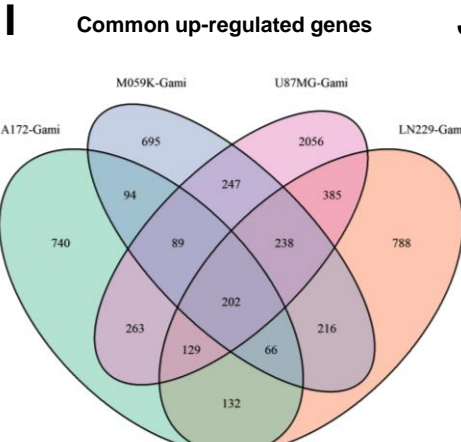

**J** **Common up-regulated pathways**

| Rank | Pathways                                                            | P value    | Adjusted P value | Count |
|------|---------------------------------------------------------------------|------------|------------------|-------|
| 1    | TRANSCRIPTIONAL_REGULATION_BY_TP53                                  | 0.00070713 | 0.02339436       | 12    |
| 2    | METABOLISM_OF_AMINO_ACIDS_AND_DERIVATIVES                           | 0.00297173 | 0.06939858       | 11    |
| 3    | CELLULAR_RESPONSE_TO_STARVATION                                     | 9.4587E-06 | 0.00059027       | 10    |
| 4    | RESPONSE_OF_EIF2AK1_HRL_TO_HEME_DEFICIENCY                          | 9.1494E-15 | 3.6323E-12       | 9     |
| 5    | UNFOLDED_PROTEIN_RESPONSE_UPR                                       | 7.7505E-07 | 0.00102659       | 9     |
| 6    | SLC_MEDIATED_TRANSMEMBRANE_TRANSPORT                                | 0.00187061 | 0.05304506       | 9     |
| 7    | RESPONSE_OF_EIF2AK4_GCN2_TO_AMINO_ACID_DEFICIENCY                   | 0.00013664 | 0.00602736       | 7     |
| 8    | TRANSPORT_OF_INORGANIC_CATIONS_ANIONS_AND_AMINO_ACIDS_OLIGOPEPTIDES | 0.00017384 | 0.00690136       | 7     |
| 9    | METABOLISM_OF_VITAMINS_AND_COFACTORS                                | 0.00511649 | 0.0940042        | 7     |
| 10   | PROGRAMMED_CELL_DEATH                                               | 0.00851147 | 0.13516214       | 7     |
| 11   | TRANSLATION                                                         | 0.04636715 | 0.36093644       | 7     |
| 12   | CYTOSOLIC_TRNA_AMINOACYLATION                                       | 1.9127E-07 | 3.7967E-05       | 6     |
| 13   | AMINO_ACID_TRANSPORT_ACROSS_THE_PLASMA_MEMBRANE                     | 1.4503E-06 | 0.0014394        | 6     |
| 14   | TRNA_AMINOACYLATION                                                 | 6.3301E-06 | 0.00050261       | 6     |
| 15   | METABOLISM_OF_WATER_SOLUBLE_VITAMINS_AND_COFACTORS                  | 0.00246908 | 0.06408716       | 6     |
| 16   | AUTOPHAGY                                                           | 0.00673404 | 0.11623541       | 6     |
| 17   | ATF4_ACTIVATES_GENES_IN_RESPONSE_TO_ENDOPLASMIC_RETICULUM_STRESS    | 1.0408E-05 | 0.00059027       | 5     |
| 18   | PERK_REGULATES_GENE_EXPRESSION                                      | 2.4832E-05 | 0.0123231        | 5     |
| 19   | DEATH_RECEPTOR_SIGNALLING                                           | 0.02046321 | 0.23893803       | 5     |
| 20   | APPTOSIS                                                            | 0.0493776  | 0.37698797       | 5     |

# Supplemental Figure 4

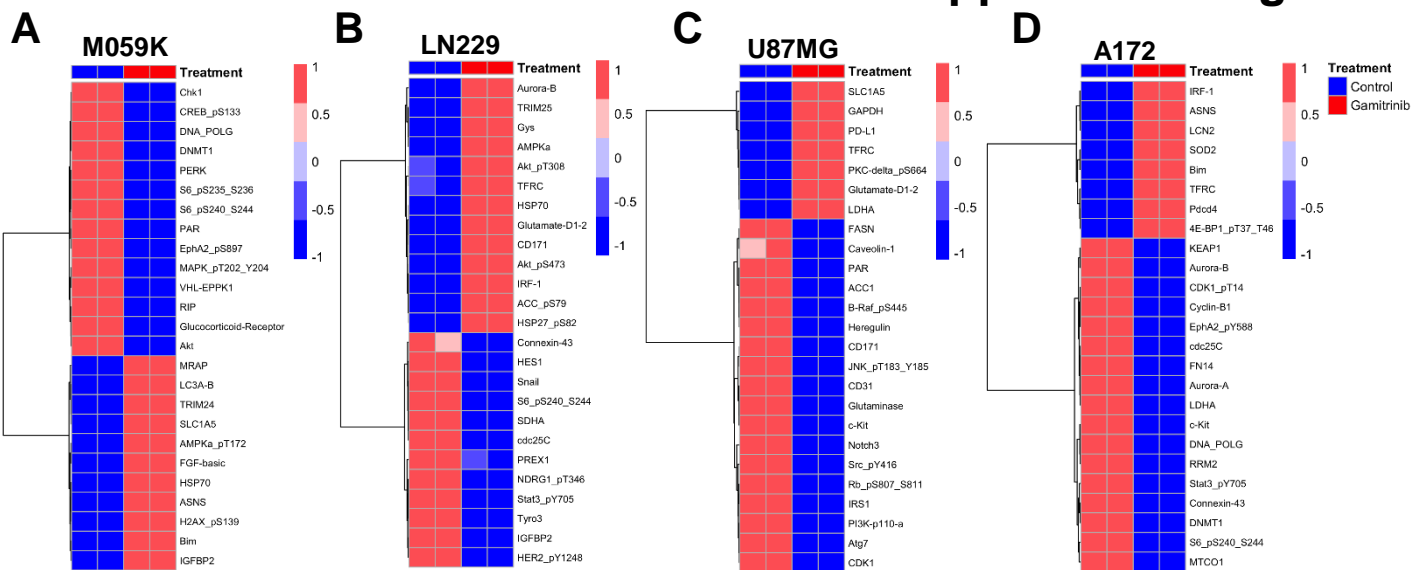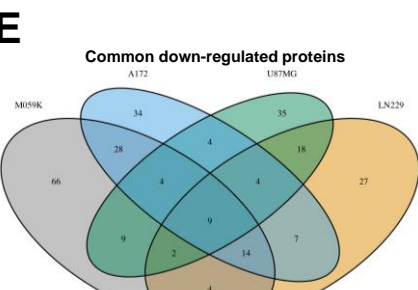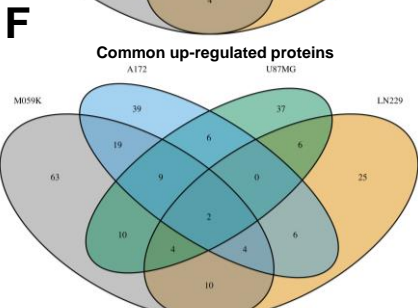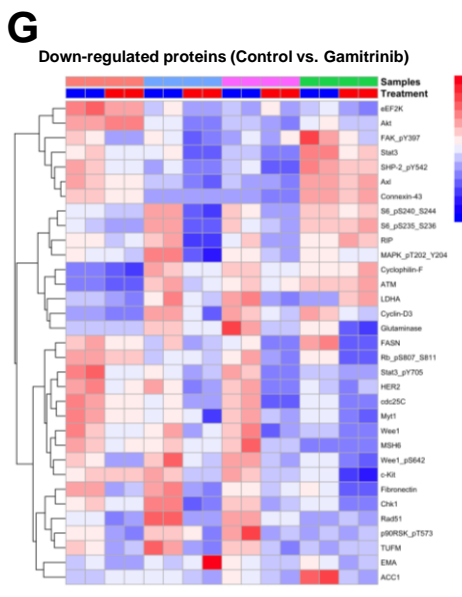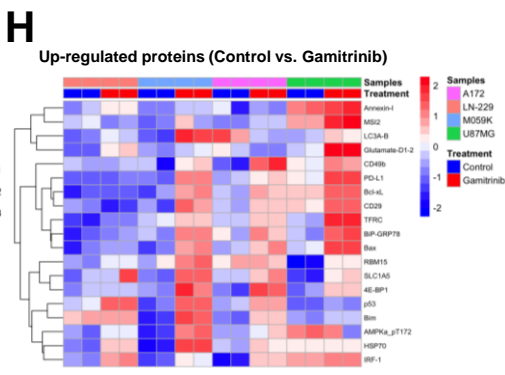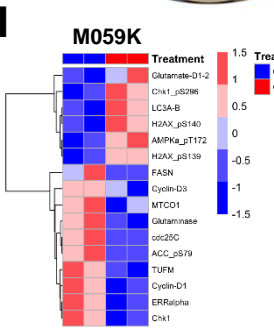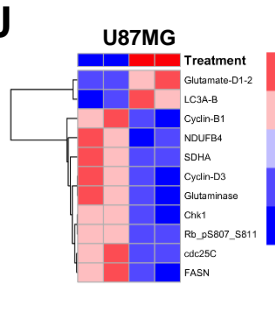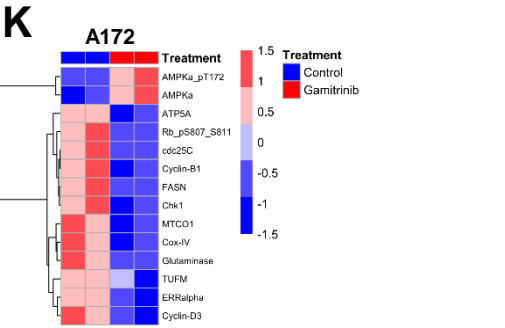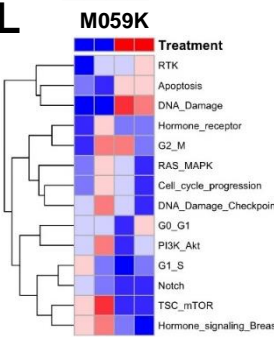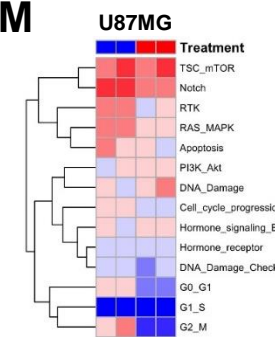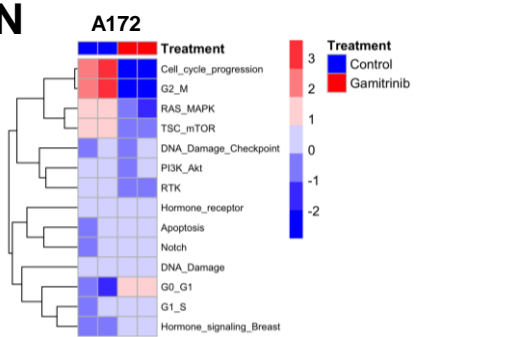

# Supplemental Figure 5

**A**

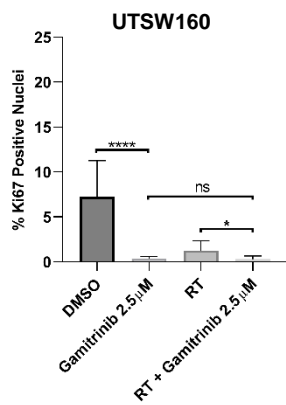

**B**

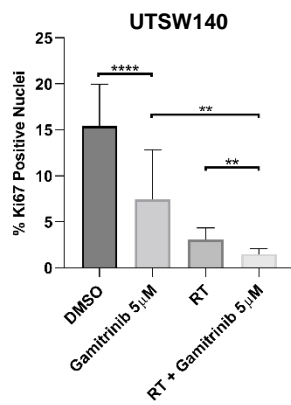

**C**

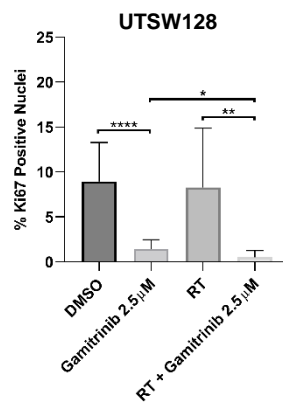

**D**

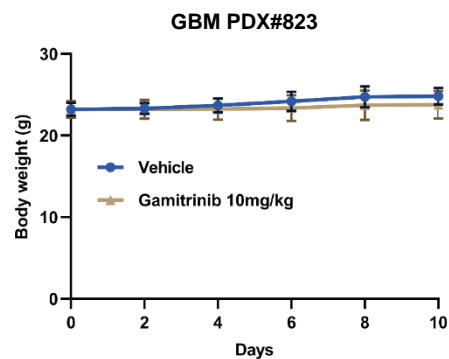

**E**

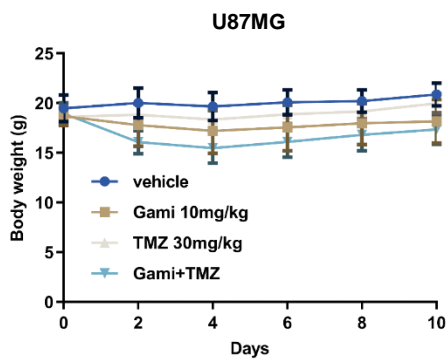

**F**

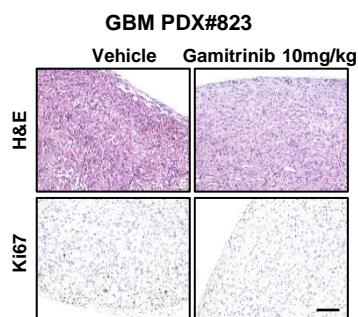

**G**

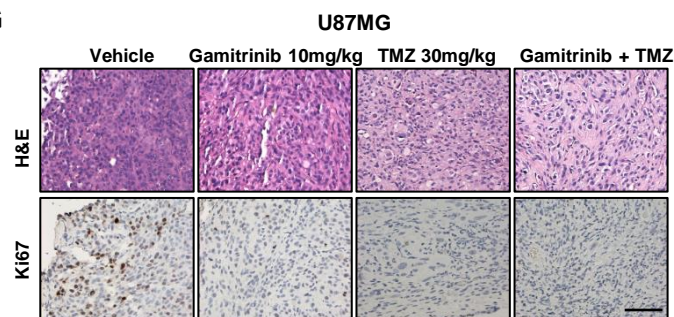

**H**

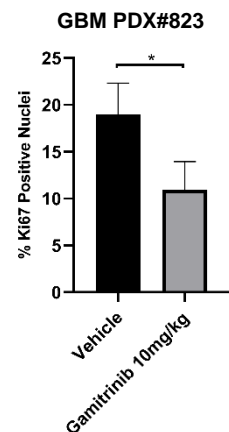

**I**

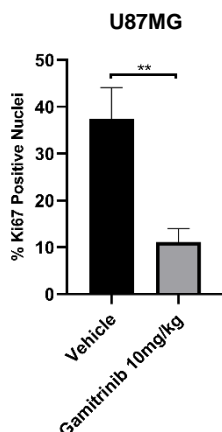

Supplement: NIHMS1853635-supplement-Supplementary_Figures.pdf [file NIHMS1853635-supplement-Supplementary_Figures.pdf]
